# Supplementary material for: Gold-supported magnetically recyclable nanocatalysts: a sustainable solution for the reduction of 4-nitrophenol in water
Source: Royal Society of Chemistry journal article supplement (doi:10.1039/c4ra15865b), 2014-12-11
Supplement: c4ra15865b1.pdf [file c4ra15865b1.pdf]

**SUPPLEMENTARY INFORMATION**

**Gold-supported magnetically recyclable nanocatalysts:  
a sustainable solution for the reduction of 4-nitrophenol in water**

Mariana Rocha,<sup>a</sup> Carlos Fernandes,<sup>a</sup> Clara Pereira,<sup>a,\*</sup> Susana L. H. Rebelo,<sup>a,\*</sup> Manuel F. R. Pereira<sup>b</sup> and Cristina Freire<sup>a,\*</sup>

a    REQUIMTE, Departamento de Química e Bioquímica, Faculdade de Ciências,  
Universidade do Porto, Rua do Campo Alegre, 4169-007, Porto, Portugal

b    Laboratório de Catálise e Materiais – Laboratório Associado LSRE/LCM,  
Faculdade de Engenharia, Universidade do Porto, 4200-465 Porto, Portugal

**Figure S1.** FTIR spectra of Mn, Mn@SiO<sub>2</sub>, Mn@SiO<sub>2</sub>-NH<sub>2</sub> and Mn@SiO<sub>2</sub>-SH samples.

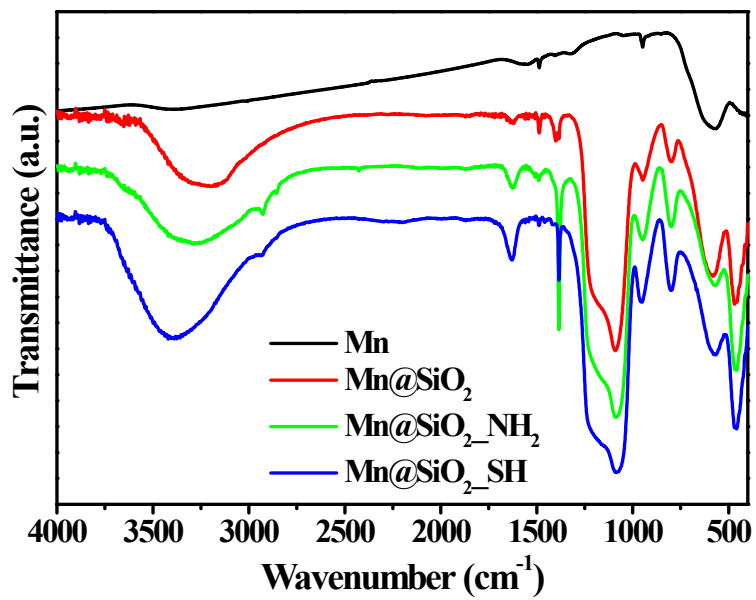

**Figure S2.** TEM micrographs of (a.1) Mn@SiO<sub>2</sub>\_SH and (a.2) Mn@SiO<sub>2</sub>\_SH@Au and EDS spectra of (b.1) Mn@SiO<sub>2</sub>\_SH and (b.2) Mn@SiO<sub>2</sub>\_SH@Au.

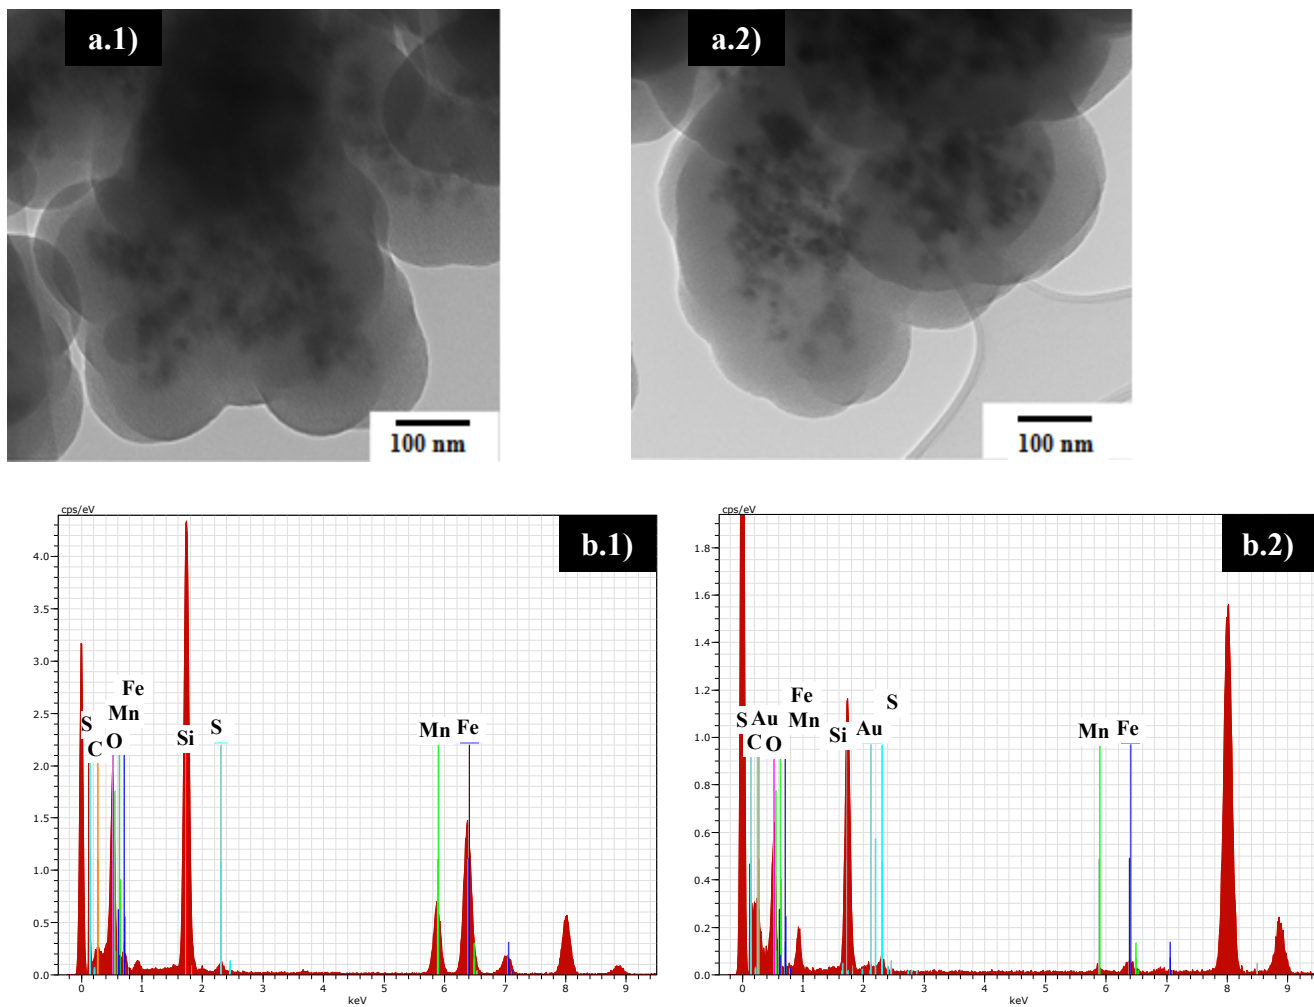

**Figure S3.**  $M(H)$  curves of samples Mn, Mn@SiO<sub>2</sub>, Mn@SiO<sub>2</sub>-NH<sub>2</sub>, Mn@SiO<sub>2</sub>-SH at 300 K.

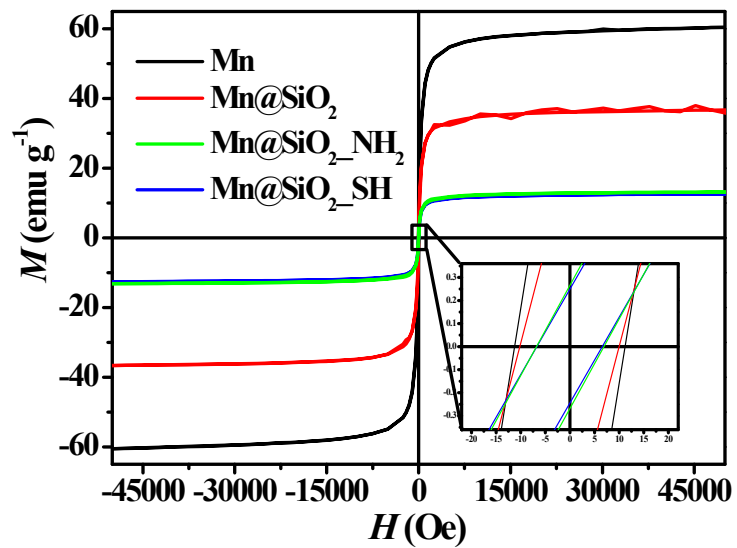

**Figure S4.** Electronic spectra of 4-NP reduction with Mn@SiO<sub>2</sub>-NH<sub>2</sub> nanosupport.

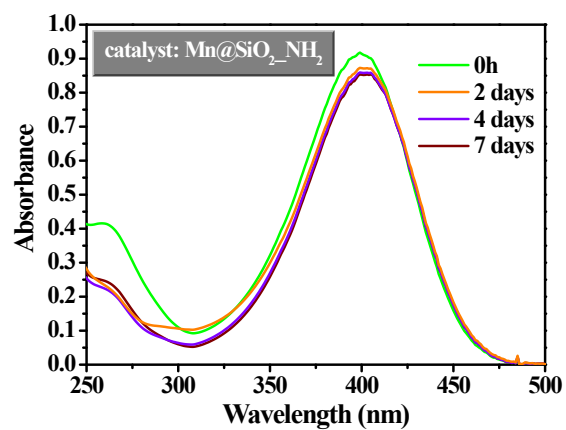

**Figure S5.** FTIR spectra of magnetic nanocatalysts before and after the catalytic recycling studies.

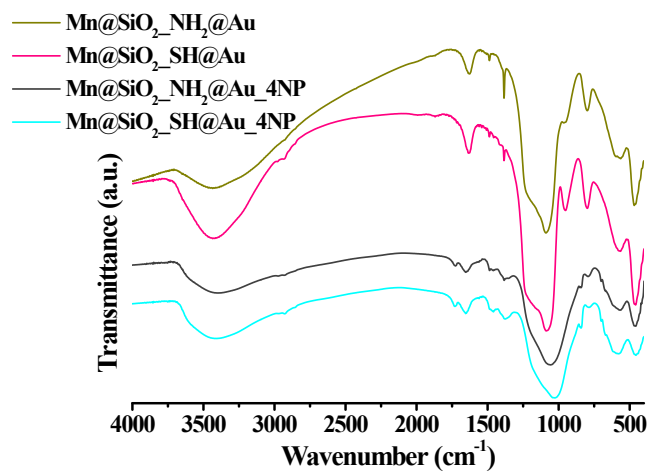

**Table S1.** Core-level binding energies and area of each component for magnetic nanomaterials obtained by curve fitting of XPS spectra

| Material                                 | C 1s                     |                       | O 1s                     |                       | N 1s                 |                       | Si 2p                |                       | Mn 2p <sub>3/2</sub>     |                       | Mn 2p <sub>1/2</sub>     |                       |
|------------------------------------------|--------------------------|-----------------------|--------------------------|-----------------------|----------------------|-----------------------|----------------------|-----------------------|--------------------------|-----------------------|--------------------------|-----------------------|
|                                          | BE (eV) <sup>a</sup>     | Area (%) <sup>b</sup> | BE (eV) <sup>a</sup>     | Area (%) <sup>b</sup> | BE (eV) <sup>a</sup> | Area (%) <sup>b</sup> | BE (eV) <sup>a</sup> | Area (%) <sup>b</sup> | BE (eV) <sup>a</sup>     | Area (%) <sup>b</sup> | BE (eV) <sup>a</sup>     | Area (%) <sup>b</sup> |
| Mn@SiO <sub>2</sub> _NH <sub>2</sub>     | 284.6 (3.1)              | 84.1                  | 531.7 (2.2)              | 82.7                  | 399.4 (2.5)          | 59.8                  | 102.6 (1.9)          | 100.0                 | 641.0 (5.0)              | 87.6                  | 652.6 (4.9)              | 43.8                  |
|                                          | 286.5 (3.1)              | 9.7                   | 529.8 (2.2)              | 17.3                  | 401.2 (2.5)          | 40.2                  |                      |                       | 646.4 (5.1) <sup>c</sup> | 12.4                  | 658.0 (5.1) <sup>c</sup> | 6.2                   |
|                                          | 288.5 (3.1)              | 6.2                   |                          |                       |                      |                       |                      |                       |                          |                       |                          |                       |
| Mn@SiO <sub>2</sub> _NH <sub>2</sub> @Au | 284.6 (2.2)              | 69.5                  | 532.4 (2.1)              | 95.5                  | 399.6 (2.3)          | 52.8                  | 103.1 (2.2)          | 100.0                 | 641.1 (4.4)              | 73.3                  | 652.7 (4.4)              | 36.7                  |
|                                          | 286.4 (2.2)              | 24.8                  | 530.4 (2.1)              | 4.5                   | 401.6 (2.3)          | 47.2                  |                      |                       | 646.5 (4.1) <sup>c</sup> | 26.7                  | 658.1 (4.1) <sup>c</sup> | 13.3                  |
|                                          | 288.5 (2.2)              | 5.7                   |                          |                       |                      |                       |                      |                       |                          |                       |                          |                       |
| Mn@SiO <sub>2</sub> _SH                  | 284.6 (2.1)              | 74.7                  | 532.5 (2.1)              | 94.6                  | 400.3 (2.4)          | 75.5                  | 103.2 (2.2)          | 100.0                 | 642.6 (4.2)              | 80.3                  | 654.2 (4.2)              | 40.2                  |
|                                          | 286.3 (2.1)              | 19.0                  | 531.0 (2.1)              | 5.4                   | 402.5 (2.4)          | 24.5                  |                      |                       | 648.0 (3.8) <sup>c</sup> | 19.7                  | 659.6 (3.8) <sup>c</sup> | 9.8                   |
|                                          | 288.4 (2.1)              | 6.2                   |                          |                       |                      |                       |                      |                       |                          |                       |                          |                       |
| Mn@SiO <sub>2</sub> _SH@Au               | 284.6 (2.5)              | 82.5                  | 532.7 (2.0)              | 73.0                  | 399.5 (2.6)          | 62.0                  | 102.9 (2.3)          | 100.0                 | 642.4 (4.4)              | 85.9                  | 654.0 (4.4)              | 43.0                  |
|                                          | 286.5 (2.5)              | 14.0                  | 531.5 (2.0)              | 27.0                  | 402.2 (2.6)          | 38.0                  |                      |                       | 647.8 (2.9) <sup>c</sup> | 14.1                  | 659.4 (2.9) <sup>c</sup> | 7.0                   |
|                                          | 288.6 (2.5)              | 3.5                   |                          |                       |                      |                       |                      |                       |                          |                       |                          |                       |
|                                          | Fe 2p <sub>3/2</sub>     |                       | Fe 2p <sub>1/2</sub>     |                       | S 2p <sub>3/2</sub>  |                       | S 2p <sub>1/2</sub>  |                       | Au 4f <sub>7/2</sub>     |                       | Au 4f <sub>5/2</sub>     |                       |
|                                          | BE (eV) <sup>a</sup>     | Area (%) <sup>b</sup> | BE (eV) <sup>a</sup>     | Area (%) <sup>b</sup> | BE (eV) <sup>a</sup> | Area (%) <sup>b</sup> | BE (eV) <sup>a</sup> | Area (%) <sup>b</sup> | BE (eV) <sup>a</sup>     | Area (%) <sup>b</sup> | BE (eV) <sup>a</sup>     | Area (%) <sup>b</sup> |
| Mn@SiO <sub>2</sub> _NH <sub>2</sub>     | 710.3 (3.2)              | 69.9                  | 723.8 (3.2)              | 35.0                  | —                    | —                     | —                    | —                     | —                        | —                     | —                        | —                     |
|                                          | 718.3 (7.2) <sup>c</sup> | 30.1                  | 731.8 (7.2) <sup>c</sup> | 15.0                  |                      |                       |                      |                       |                          |                       |                          |                       |
| Mn@SiO <sub>2</sub> _NH <sub>2</sub> @Au | 710.5 (3.3)              | 64.5                  | 724.0 (3.3)              | 32.3                  | —                    | —                     | —                    | —                     | 84.2 (2.0)               | 57.1                  | 87.9 (2.0)               | 42.9                  |
|                                          | 718.5 (6.3) <sup>c</sup> | 35.5                  | 732.0 (6.3) <sup>c</sup> | 17.7                  |                      |                       |                      |                       |                          |                       |                          |                       |
| Mn@SiO <sub>2</sub> _SH                  | 710.7 (3.5)              | 72.8                  | 724.2 (3.5)              | 36.4                  | 163.3 (2.0)          | 44.3                  | 164.5 (2.0)          | 22.2                  | —                        | —                     | —                        | —                     |
|                                          | 718.7 (7.2) <sup>c</sup> | 27.2                  | 732.2 (7.2) <sup>c</sup> | 13.6                  | 168.3 (2.0)          | 22.3                  | 169.5 (2.0)          | 11.2                  |                          |                       |                          |                       |

|                                 |                          |      |                          |      |             |      |             |      |            |      |            |      |
|---------------------------------|--------------------------|------|--------------------------|------|-------------|------|-------------|------|------------|------|------------|------|
| <b>Mn@SiO<sub>2</sub>_SH@Au</b> | 710.3 (3.2)              | 69.9 | 723.8 (3.2)              | 35.0 | 162.7 (2.3) | 38.2 | 163.9 (2.3) | 19.1 | 84.5 (2.3) | 57.1 | 88.2 (2.3) | 42.9 |
|                                 | 718.3 (7.2) <sup>c</sup> | 30.1 | 731.8 (7.2) <sup>c</sup> | 15.0 | 167.8 (2.3) | 28.4 | 169.0 (2.3) | 14.2 |            |      |            |      |

<sup>a</sup> The values between brackets refer to the full-width at half maximum of the bands.

<sup>b</sup> Area of each component relative to the total core-level peak area.

<sup>c</sup> Satellite peak.
